# Supplementary material
Source: PubMed Central journal article supplement (PMC1482628)

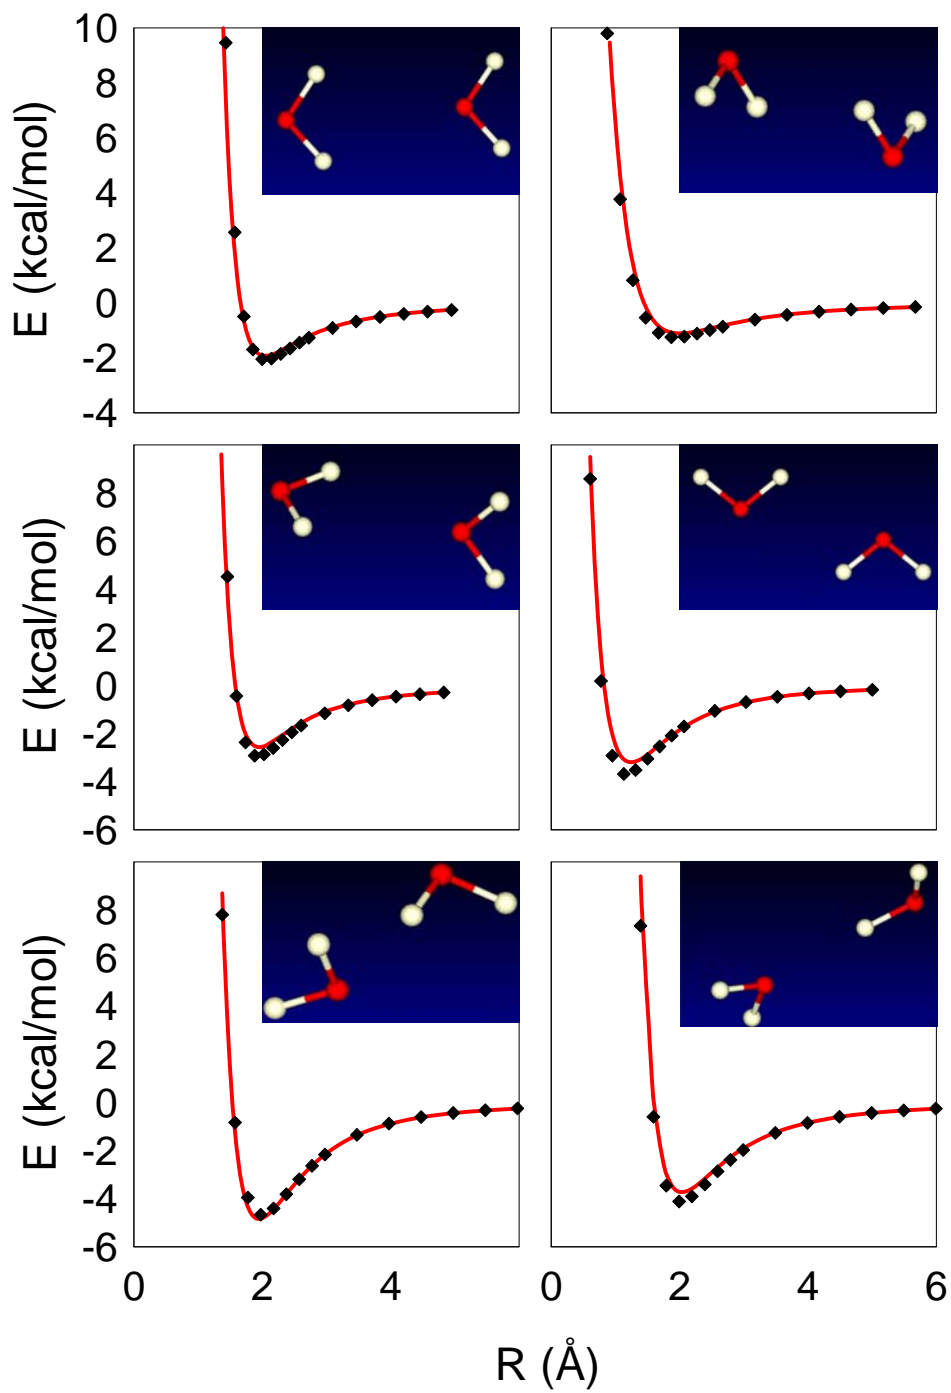

Supplement: pnas_0602982103_1.pdf [file pnas_0602982103_1.pdf]
